# Supplementary material
Source: PubMed Central journal article supplement (PMC7682791)
Supplement: atv-40-2975-s001.pdf [file atv-40-2975-s001.pdf]

## **SUPPLEMENTAL MATERIALS**

### **Platelets promote thrombo-inflammation in SARS-CoV-2 pneumonia**

Taus Francesco, MS, PhD<sup>1\*</sup>, Salvagno Gianluca MD, PhD<sup>2\*</sup>, Canè Stefania MS, PhD<sup>3\*</sup>, Fava Cristiano MD, PhD<sup>1</sup>, Mazzaferri Fulvia, MD, PhD<sup>4</sup>, Carrara Elena, MD<sup>4</sup>, Petrova Varvara MS, PhD<sup>3</sup>, Barouni Roza Maria MS<sup>3</sup>, Dima Francesco, MD<sup>2</sup>, Dalbeni Andrea MD, PhD<sup>1</sup>, Romano Simone MD, PhD<sup>1</sup>, Poli Giovanni, MD<sup>2</sup>, Benati Marco MS, PhD<sup>2</sup>, Denitto Simone MD<sup>2</sup>, Mansueto Giancarlo MD<sup>5</sup>, Iezzi Manuela MS, PhD<sup>6</sup>, Tacconelli Evelina MD, PhD<sup>4</sup>, Lippi Giuseppe MD, PhD<sup>2</sup>, Bronte Vincenzo MD, PhD<sup>3</sup>, Minuz Pietro MD<sup>1</sup> \* Equal contribution

Affiliations:

<sup>1</sup> Department of Medicine, Section of General Medicine & Hypertension, University of Verona, Verona, Italy; <sup>2</sup> Laboratory of Clinical Biochemistry, Department of Life and Reproduction Sciences, University of Verona, Verona, Italy; <sup>3</sup> Immunology Section, Department of Medicine, University and Hospital Trust of Verona, Verona, Italy; <sup>4</sup> Department of Diagnostics and Public Health, Section of Infectious Diseases, University of Verona, Verona, Italy; <sup>5</sup> Department of Diagnostic and Public Health, Section of Radiology, University of Verona, Verona, Italy; <sup>6</sup> CAST- Center for Advanced Studies and Technology, University G. D'Annunzio of Chieti-Pescara, Chieti, Italy.

**Corresponding author:**

Pietro Minuz, MD, FBPhS,

## Major Resources Table

### Antibodies

| Target antigen | Fluorochrome | Clone       | Vendor or Source |
|----------------|--------------|-------------|------------------|
| PAC1           | FITC         | PAC1        | BD Biosciences   |
| CD14           | PE           | M $\phi$ P9 | BD Biosciences   |
| CD41           | FITC         | HIP8        | BD Biosciences   |
| CD41           | PE           | HIP8        | BD Biosciences   |
| CD45           | PerCP-Cy5 .5 | 2D1         | Biolegend        |
| CD66b          | BV421        | G10F5       | Biolegend        |
| CD62P          | FITC         | CLBThromb/6 | Beckman coulter  |

### Supplemental Materials

Table I

| Material                                                                                                           | Vendor or Source                            |
|--------------------------------------------------------------------------------------------------------------------|---------------------------------------------|
| Collagen Equine tendon collagen (Collagen reagent Horm <sup>®</sup> ) used to evaluate platelet activation markers | Takeda (Austria)                            |
| Cal-Lyse <sup>™</sup> Lysing solution                                                                              | Invitrogen                                  |
| Flow cytometer FACS- Canto II                                                                                      | BD (Franklin Lakes, NJ, USA)                |
| FlowJo software for flow cytometry analysis                                                                        | Treestar Inc.                               |
| Human Procartaplex <sup>™</sup> Panel 1 Multiplex                                                                  | Thermo Fisher Scientific (Waltham, MA, USA) |
| ParaFormaldehyde solution (37%)                                                                                    | Sigma-Aldrich (Italy).                      |

Supplemental figures

Supplemental Figure I

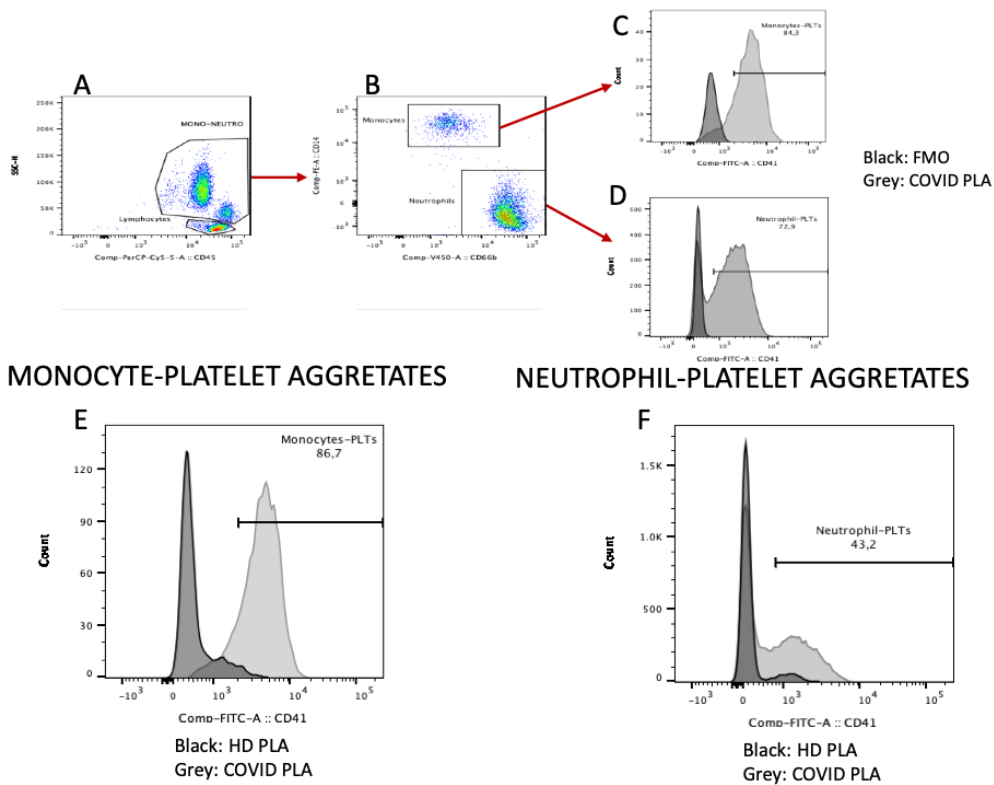

Supplemental Figure I: Gating strategy of whole blood analysis of Platelet-Leukocyte Aggregates (PLA) in COVID patients and in Healthy donors (HD). Leukocytes are labelled with anti-CD45-FITC and plotted versus side light scatter (A). Monocytes and Neutrophils were labelled with anti-CD14 and anti-CD66b, respectively (B). A gated histogram of CD14 monocytes is plotted and a marker is placed just above the FMO control peak (black histogram). The platelet-positive monocytes stain brightly with anti-CD41-PE (grey histogram) (C). A gated histogram of CD66b neutrophils is plotted and analysed in the same manner as the monocytes (D). Histograms representative of the difference between the presence of leukocyte-platelet aggregates in COVID patients (grey histogram) and healthy donor (black histogram) (E-F).

## Supplemental Figure II

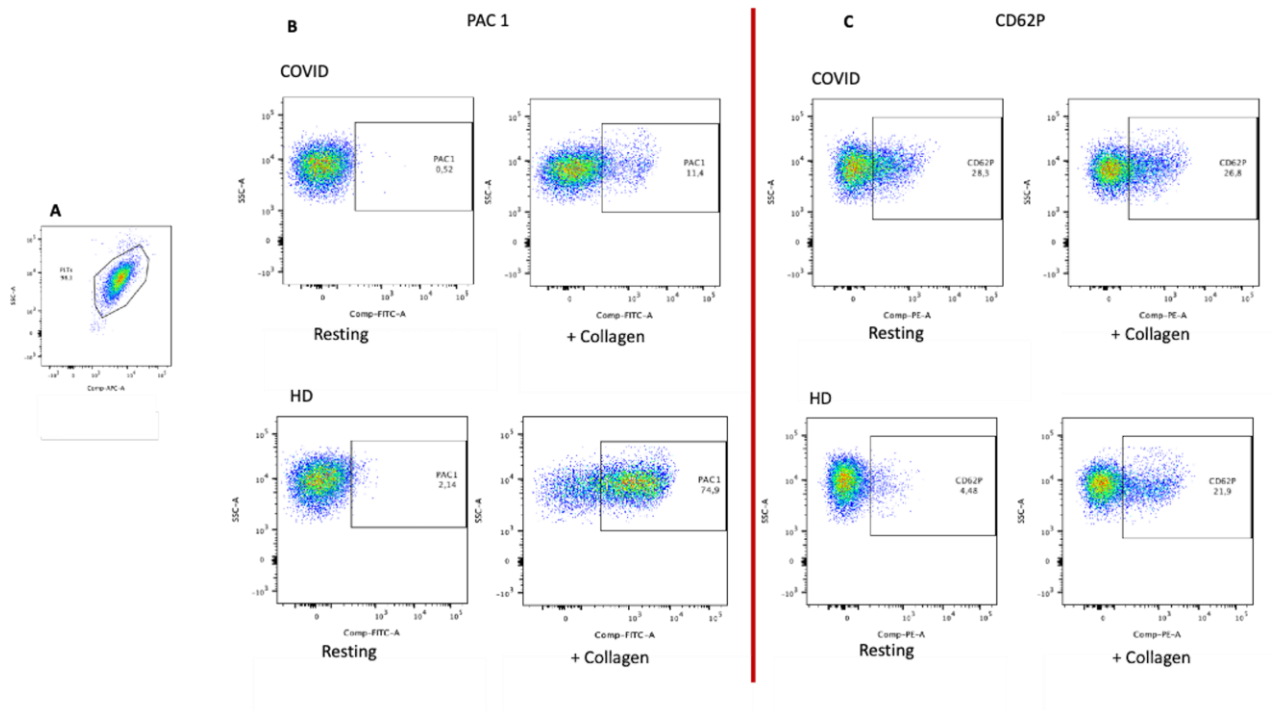

Supplemental Figure II: Gating strategy of flow cytometry detection of activated platelet. Platelets gate was determined by anti CD61 (A). The expression of the active form of the fibrinogen receptor, as detected using the monoclonal antibody PAC1 for the active fibrinogen receptor (B) and CD62P (C) were assessed on the CD61 positive population stimulated or not with collagen.

### Supplemental Figure III

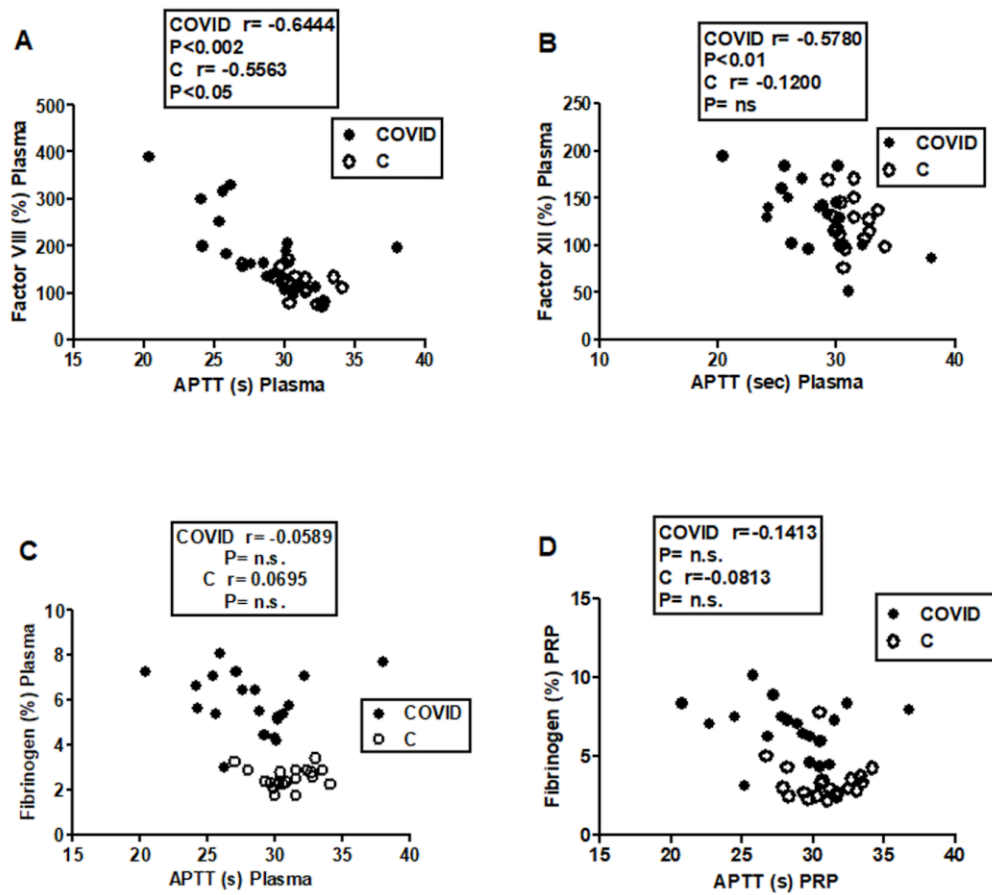

Supplemental Figure III: Factor VIII activity correlates with APTT using plasma collected from COVID-19 patients (n=20) and healthy controls (n=20) (Panel A). Factor XII activity in plasma collected from COVID-19 patients correlated with APTT (n=20). This is not observed in healthy controls (n=20) (Panel B). Fibrinogen activity does not correlate with APTT neither in plasma nor in PRP from COVID-19 patients (n=20) as well as in control subjects (n=20) (Panel C and D).

### Supplemental Figure IV

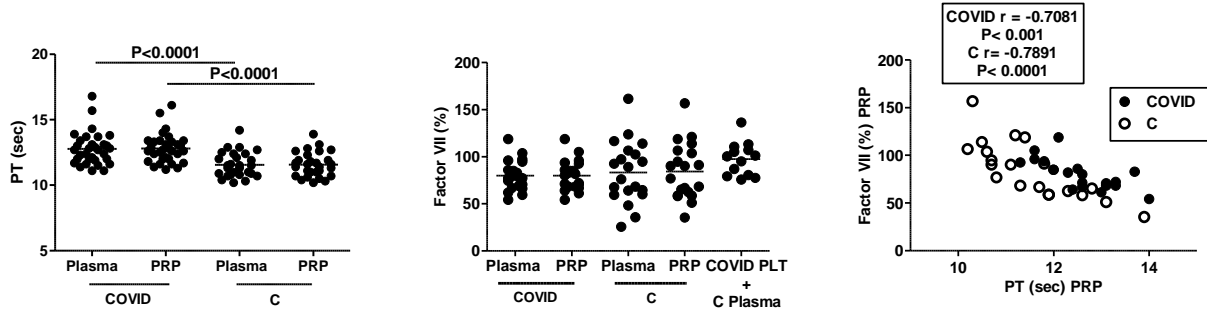

Supplemental Figure IV: Prothrombin time (PT) tested using plasma and PRP from COVID-19 patients (n=32) was significantly longer compared to healthy controls (n=28) (Panel A). The activity of the coagulation factor VII is similar in plasma and PRP in COVID-19 patients (n=20) and healthy controls (n=20) as well as in washed platelet suspended in control plasma (n=(Panel B) and correlates with APTT in both conditions (Panel C and D)

Supplemental Figure V

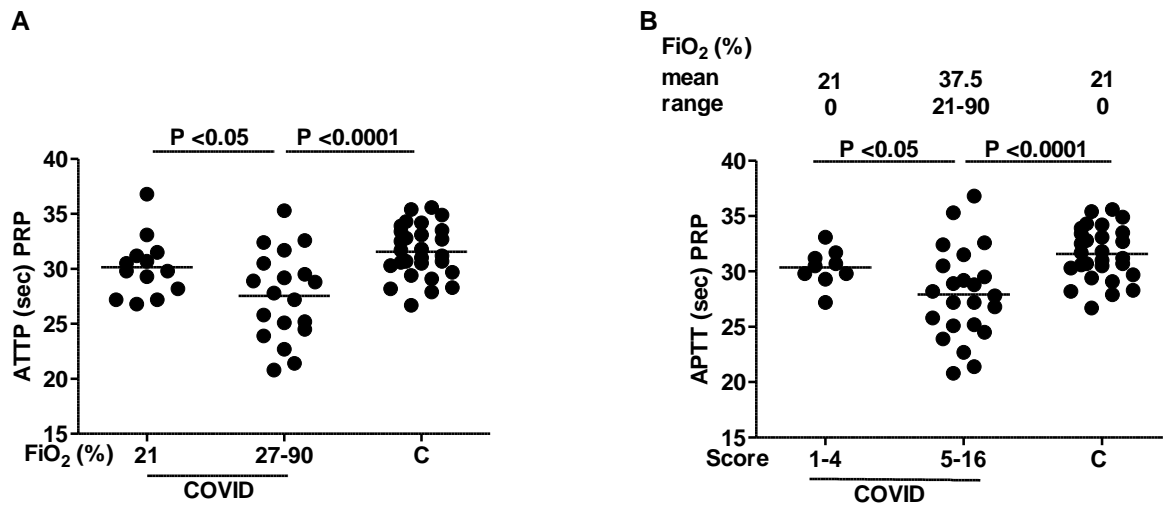

Supplemental Figure V: The severity of SARS-CoV-2 pneumonia, as assessed either by measuring oxygen requirement ( $FiO_2 > 21$ ) or the radiologic score based on the area of lung interstitial alterations is associated with differences in APTT tested with platelet rich plasma (PRP) from the same patients ( $n=32$ ) (Panels A and B). In comparison with healthy controls ( $n=28$ ) and patients with limited pneumonia not requiring oxygen supply, those with more severe pneumonia show a significantly shorter APTT.
